# Supplementary material for: Medication-assisted quit rates in participants with smoking-related diseases in EAGLES: Post hoc analyses of a double-blind, randomized, placebo-controlled clinical trial
Source: PubMed Central journal article supplement (PMC9086158; doi:10.18332/tid/146567), 2022-05-10
Supplement: TID-20-46-s1.pdf [file TID-20-46-s1.pdf]

## SUPPLEMENTARY MATERIAL

**Table S1** Continuous abstinence rates for weeks 9–12 (CAR9-12) and 9–24 (CAR9-24) by treatment and cohort, and by smoking-related-disease subcohort in all randomized EAGLES participants<sup>a</sup>

|                           | <b>Asthma<br/>(n=486)</b> | <b>COPD<br/>(n=412)</b> | <b>Diabetes<br/>(n=409)</b> | <b>CVD<br/>(n=285)</b> | <b>All disease<br/>subcohorts<sup>a</sup><br/>(n=1372)</b> | <b>No smoking-<br/>related diseases<sup>b</sup><br/>(n=6039)</b> |
|---------------------------|---------------------------|-------------------------|-----------------------------|------------------------|------------------------------------------------------------|------------------------------------------------------------------|
| <b>Varenicline, n (%)</b> | <b>(n=131)</b>            | <b>(n=99)</b>           | <b>(n=100)</b>              | <b>(n=74)</b>          | <b>(n=344)</b>                                             | <b>(n=1521)</b>                                                  |
| CAR9-12                   | 29 (22.1)                 | 27 (27.3)               | 39 (39.0)                   | 21 (28.4)              | 103 (29.9)                                                 | 530 (34.8)                                                       |
| CAR9-24                   | 18 (13.7)                 | 15 (15.2)               | 25 (25.0)                   | 11 (14.9)              | 63 (18.3)                                                  | 355 (23.3)                                                       |
| <b>Bupropion, n (%)</b>   | <b>(n=103)</b>            | <b>(n=98)</b>           | <b>(n=110)</b>              | <b>(n=74)</b>          | <b>(n=336)</b>                                             | <b>(n=1514)</b>                                                  |
| CAR9-12                   | 18 (17.5)                 | 17 (17.3)               | 26 (23.6)                   | 20 (27.0)              | 70 (20.8)                                                  | 356 (23.5)                                                       |
| CAR9-24                   | 14 (13.6)                 | 8 (8.2)                 | 18 (16.4)                   | 10 (13.5)              | 46 (13.7)                                                  | 262 (17.3)                                                       |
| <b>NRT, n (%)</b>         | <b>(n=124)</b>            | <b>(n=98)</b>           | <b>(n=96)</b>               | <b>(n=74)</b>          | <b>(n=338)</b>                                             | <b>(n=1516)</b>                                                  |
| CAR9-12                   | 16 (12.9)                 | 18 (18.4)               | 26 (27.1)                   | 20 (27.0)              | 69 (20.4)                                                  | 372 (24.5)                                                       |
| CAR9-24                   | 8 (6.5)                   | 11 (11.2)               | 20 (20.8)                   | 7 (9.5)                | 42 (12.4)                                                  | 254 (16.8)                                                       |
| <b>Placebo, n (%)</b>     | <b>(n=128)</b>            | <b>(n=117)</b>          | <b>(n=103)</b>              | <b>(n=63)</b>          | <b>(n=354)</b>                                             | <b>(n=1488)</b>                                                  |
| CAR9-12                   | 21 (16.4)                 | 11 (9.4)                | 8 (7.8)                     | 9 (14.3)               | 43 (12.1)                                                  | 192 (12.9)                                                       |
| CAR9-24                   | 11 (8.6)                  | 6 (5.1)                 | 5 (4.9)                     | 7 (11.1)               | 28 (7.9)                                                   | 148 (9.9)                                                        |

<sup>a</sup>Participants may appear in multiple smoking-related-disease subcohorts.

<sup>b</sup>Participants without asthma, COPD, diabetes, or CVD.

CAR: continuous abstinence rate; COPD: chronic obstructive pulmonary disease; CVD: cardiovascular disease; NRT: nicotine replacement therapy.

**Table S2** Stepwise logistic modeling: analysis of predictors of continuous abstinence for weeks 9–12 (CA9-12) and 9–24 (CA9-24) in all randomized EAGLES participants

| Model terms                                                    | Forced inclusion <sup>a</sup> | CA9-12 |           |         | CA9-24 |           |         |
|----------------------------------------------------------------|-------------------------------|--------|-----------|---------|--------|-----------|---------|
|                                                                |                               | OR     | 95% CI    | p       | OR     | 95% CI    | p       |
| Treatment <sup>a</sup>                                         | Yes                           |        |           |         |        |           |         |
| Smoking-related-disease cohort vs. controls                    | Yes                           | 0.797  | 0.68–0.93 | 0.0042  | 0.705  | 0.59–0.85 | 0.0002  |
| Psychiatric vs. non-psychiatric cohort                         | Yes                           | 0.742  | 0.66–0.83 | <0.0001 | 0.720  | 0.63–0.82 | <0.0001 |
| Region: non-USA vs. USA                                        | Yes                           | 1.984  | 1.76–2.24 | <0.0001 | 1.997  | 1.73–2.31 | <0.0001 |
| Race                                                           | No                            |        |           |         |        |           |         |
| Black vs. White                                                |                               | 0.576  | 0.47–0.71 | <0.0001 | 0.548  | 0.43–0.70 | <0.0001 |
| Other vs. White                                                |                               | 0.779  | 0.57–1.06 | 0.1115  | 0.797  | 0.56–1.13 | 0.2028  |
| Prior use of NRT (yes vs. no)                                  | No                            | –      | –         | NS      | 0.783  | 0.67–0.92 | 0.0031  |
| Contact with a smoker (yes vs. no)                             | No                            | 0.784  | 0.69–0.89 | 0.0001  | 0.802  | 0.70–0.92 | 0.0020  |
| Lifetime prior quit attempt (yes vs. no)                       | No                            | 1.227  | 1.05–1.43 | 0.0097  | –      | –         | NS      |
| FTCD score (1-unit increase: higher score = higher dependence) | No                            | 0.918  | 0.89–0.95 | <0.0001 | 0.925  | 0.89–0.96 | <0.0001 |
| Age, years (1-year increase)                                   | No                            | 1.012  | 1.01–1.02 | <0.0001 | 1.013  | 1.01–1.02 | <0.0001 |
| BMI, kg/m <sup>2</sup> (1-unit increase)                       | No                            | –      | –         | NS      | 1.017  | 1.01–1.03 | 0.0028  |
| Cigarettes per day in the past month (1-cigarette increase)    | No                            | 0.971  | 0.96–0.98 | <0.0001 | 0.973  | 0.96–0.98 | <0.0001 |

<sup>a</sup>Treatment results are presented in Figure 2 of the article.  $p < 0.05$  was considered statistically significant. Terms that were significant predictors of abstinence for weeks 9–12 and/or 9–24 are shown. Non-significant candidate terms included: treatment by medical history cohort interaction, gender, alcohol and/or substance dependence/use/abuse comorbidity, alcohol dependence or abuse comorbidity, substance dependence or use comorbidity, C-SSRS lifetime suicidality behavior and/or ideation, C-SSRS lifetime suicidality behavior, C-SSRS lifetime suicidality ideation, prior use of varenicline, prior use of bupropion, lives with a smoker, age started smoking, HADS Anxiety at baseline, HADS Depression at baseline.

BMI: body mass index; CA: continuous abstinence; CI: confidence interval; C-SSRS: Columbia-Suicide Severity Rating Scale; FTCD: Fagerström Test for Cigarette Dependence; HADS: Hospital Anxiety and Depression Scale; NRT: nicotine replacement therapy; NS: not significant; OR: odds ratio.

**Table S3** Stepwise logistic modeling: analysis of varenicline (or bupropion or NRT) versus placebo across smoking-related-disease subcohorts in all randomized EAGLES participants<sup>a</sup>

|                                | Asthma |           | COPD |            | Diabetes |            | CVD  |           | No smoking-related diseases <sup>b</sup> |           |
|--------------------------------|--------|-----------|------|------------|----------|------------|------|-----------|------------------------------------------|-----------|
|                                | OR     | 95% CI    | OR   | 95% CI     | OR       | 95% CI     | OR   | 95% CI    | OR                                       | 95% CI    |
| <b>Varenicline vs. placebo</b> |        |           |      |            |          |            |      |           |                                          |           |
| CA9-12                         | 1.51   | 0.81–2.83 | 4.42 | 2.01–9.70  | 8.09     | 3.49–18.76 | 2.31 | 0.96–5.59 | 3.74                                     | 3.10–4.50 |
| CA9-24                         | 1.86   | 0.83–4.16 | 3.87 | 1.42–10.58 | 6.87     | 2.48–19.05 | 1.28 | 0.46–3.57 | 2.83                                     | 2.29–3.48 |
| <b>Bupropion vs. placebo</b>   |        |           |      |            |          |            |      |           |                                          |           |
| CA9-12                         | 1.09   | 0.55–2.19 | 2.29 | 1.00–5.24  | 3.79     | 1.61–8.93  | 2.00 | 0.82–4.85 | 2.12                                     | 1.75–2.58 |
| CA9-24                         | 1.73   | 0.74–4.02 | 1.80 | 0.60–5.45  | 3.94     | 1.39–11.17 | 1.09 | 0.38–3.12 | 1.93                                     | 1.55–2.40 |
| <b>NRT vs. placebo</b>         |        |           |      |            |          |            |      |           |                                          |           |
| CA9-12                         | 0.79   | 0.39–1.62 | 2.33 | 1.03–5.28  | 4.33     | 1.82–10.27 | 1.98 | 0.82–4.81 | 2.24                                     | 1.84–2.71 |
| CA9-24                         | 0.82   | 0.31–2.13 | 2.47 | 0.87–7.03  | 5.01     | 1.77–14.17 | 0.72 | 0.23–2.22 | 1.85                                     | 1.48–2.30 |

Model terms included treatment, psychiatric cohort (psychiatric vs. non-psychiatric), and region (non-USA vs. USA).

<sup>a</sup>Participants may appear in multiple smoking-related-disease subcohorts.

<sup>b</sup>Participants without asthma, COPD, diabetes, or CVD.

CA: continuous abstinence; CI: confidence interval; COPD: chronic obstructive pulmonary disease; CVD: cardiovascular disease; OR: odds ratio.

**Table S4** Weight and change from baseline weight by treatment and cohort in all treated EAGLES participants

|                                      | All disease subcohorts <sup>a</sup> |             |             |             |             | No smoking-related diseases <sup>b</sup> |             |             |             |             |
|--------------------------------------|-------------------------------------|-------------|-------------|-------------|-------------|------------------------------------------|-------------|-------------|-------------|-------------|
|                                      | Varenicline                         | Bupropion   | NRT         | Placebo     | All         | Varenicline                              | Bupropion   | NRT         | Placebo     | All         |
| Baseline weight                      |                                     |             |             |             |             |                                          |             |             |             |             |
| n                                    | 338                                 | 332         | 334         | 351         | 1355        | 1496                                     | 1487        | 1498        | 1461        | 5942        |
| Mean (SD), kg                        | 85.5 (21.7)                         | 84.7 (22.5) | 83.2 (20.2) | 84.2 (20.5) | 84.4 (21.2) | 80.0 (20.0)                              | 80.1 (20.0) | 80.1 (19.5) | 80.3 (20.0) | 80.1 (19.9) |
| Weight change from baseline: week 12 |                                     |             |             |             |             |                                          |             |             |             |             |
| n                                    | 278                                 | 289         | 284         | 294         | 1145        | 1291                                     | 1266        | 1265        | 1246        | 5068        |
| Mean (SD), kg                        | 1.2 (2.9)                           | 0.6 (2.8)   | 1.3 (2.9)   | 0.5 (3.0)   | 0.9 (2.9)   | 1.3 (2.8)                                | 0.7 (2.7)   | 1.1 (2.7)   | 0.8 (2.6)   | 1.0 (2.7)   |
| Weight change from baseline: week 24 |                                     |             |             |             |             |                                          |             |             |             |             |
| n                                    | 251                                 | 262         | 248         | 272         | 1033        | 1169                                     | 1128        | 1122        | 1097        | 4516        |
| Mean (SD), kg                        | 1.8 (4.3)                           | 1.2 (4.1)   | 1.3 (3.5)   | 0.7 (3.8)   | 1.2 (3.9)   | 1.8 (3.8)                                | 1.3 (3.7)   | 1.3 (3.6)   | 0.9 (3.6)   | 1.4 (3.7)   |

<sup>a</sup>Participants may appear in multiple smoking-related-disease subcohorts.

<sup>b</sup>Participants without asthma, COPD, diabetes, or CVD.

COPD: chronic obstructive pulmonary disease; CVD: cardiovascular disease; NRT: nicotine replacement therapy; SD: standard deviation.

**Table S5** Common adverse events<sup>a</sup> by treatment and cohort for all treated EAGLES participants

| MedDRA PT <sup>c</sup>            | All disease subcohorts <sup>a</sup> , n (%) |                      |                |                    |                 | No smoking-related diseases <sup>b</sup> , n (%) |                       |                 |                     |                 |
|-----------------------------------|---------------------------------------------|----------------------|----------------|--------------------|-----------------|--------------------------------------------------|-----------------------|-----------------|---------------------|-----------------|
|                                   | Varenicline<br>(n=340)                      | Bupropion<br>(n=333) | NRT<br>(n=336) | Placebo<br>(n=354) | All<br>(n=1363) | Varenicline<br>(n=1505)                          | Bupropion<br>(n=1494) | NRT<br>(n=1503) | Placebo<br>(n=1468) | All<br>(n=5970) |
| Abnormal dreams                   | 37 (10.9)                                   | 25 (7.5)             | 43 (12.8)      | 15 (4.2)           | 120 (8.8)       | 137 (9.1)                                        | 78 (5.2)              | 173 (11.5)      | 70 (4.8)            | 458 (7.7)       |
| Agitation                         | 11 (3.2)                                    | 18 (5.4)             | 12 (3.6)       | 7 (2.0)            | 48 (3.5)        | 53 (3.5)                                         | 44 (2.9)              | 46 (3.1)        | 46 (3.1)            | 189 (3.2)       |
| Anxiety                           | 24 (7.1)                                    | 29 (8.7)             | 28 (8.3)       | 21 (5.9)           | 102 (7.5)       | 88 (5.8)                                         | 11 (7.4)              | 91 (6.1)        | 85 (5.8)            | 375 (6.3)       |
| Application site pruritus         | 6 (1.8)                                     | 3 (0.9)              | 15 (4.5)       | 4 (1.1)            | 28 (2.1)        | 14 (0.9)                                         | 9 (0.6)               | 80 (5.3)        | 11 (0.7)            | 114 (1.9)       |
| Bronchitis                        | 9 (2.6)                                     | 10 (3.0)             | 17 (5.1)       | 14 (4.0)           | 50 (3.7)        | 17 (1.1)                                         | 18 (1.2)              | 17 (1.1)        | 22 (1.5)            | 74 (1.2)        |
| Constipation                      | 18 (5.3)                                    | 20 (6.0)             | 9 (2.7)        | 6 (1.7)            | 53 (3.9)        | 65 (4.3)                                         | 48 (3.2)              | 34 (2.3)        | 28 (1.9)            | 175 (2.9)       |
| Diarrhea                          | 18 (5.3)                                    | 16 (4.8)             | 14 (4.2)       | 14 (4.0)           | 62 (4.5)        | 51 (3.4)                                         | 32 (2.1)              | 57 (3.8)        | 37 (2.5)            | 177 (3.0)       |
| Dizziness                         | 16 (4.7)                                    | 16 (4.8)             | 23 (6.8)       | 16 (4.5)           | 71 (5.2)        | 58 (3.9)                                         | 77 (5.2)              | 55 (3.7)        | 40 (2.7)            | 230 (3.9)       |
| Dry mouth                         | 13 (3.8)                                    | 34 (10.2)            | 12 (3.6)       | 10 (2.8)           | 69 (5.1)        | 51 (3.4)                                         | 98 (6.6)              | 43 (2.9)        | 45 (3.1)            | 237 (4.0)       |
| Dysgeusia                         | 13 (3.8)                                    | 17 (5.1)             | 7 (2.1)        | 11 (3.1)           | 48 (3.5)        | 35 (2.3)                                         | 62 (4.1)              | 27 (1.8)        | 22 (1.5)            | 146 (2.4)       |
| Fatigue                           | 26 (7.6)                                    | 12 (3.6)             | 20 (6.0)       | 18 (5.1)           | 76 (5.6)        | 78 (5.2)                                         | 34 (2.3)              | 47 (3.1)        | 51 (3.5)            | 210 (3.5)       |
| Headache                          | 46 (13.5)                                   | 27 (8.1)             | 44 (13.1)      | 37 (10.5)          | 154 (11.3)      | 176 (11.7)                                       | 137 (9.2)             | 175 (11.6)      | 147 (10.0)          | 635 (10.6)      |
| Insomnia                          | 33 (9.7)                                    | 41 (12.3)            | 33 (9.8)       | 29 (8.2)           | 136 (10.0)      | 134 (8.9)                                        | 181 (12.1)            | 142 (9.4)       | 99 (6.7)            | 556 (9.3)       |
| Irritability                      | 13 (3.8)                                    | 18 (5.4)             | 16 (4.8)       | 12 (3.4)           | 59 (4.3)        | 59 (3.9)                                         | 42 (2.8)              | 81 (5.4)        | 78 (5.3)            | 260 (4.4)       |
| Nasopharyngitis                   | 34 (10.0)                                   | 23 (6.9)             | 25 (7.4)       | 30 (8.5)           | 112 (8.2)       | 125 (8.3)                                        | 120 (8.0)             | 91 (6.1)        | 95 (6.5)            | 431 (7.2)       |
| Nausea                            | 83 (24.4)                                   | 36 (10.8)            | 37 (11.0)      | 30 (8.5)           | 186 (13.6)      | 379 (25.2)                                       | 142 (9.5)             | 146 (9.7)       | 94 (6.4)            | 761 (12.7)      |
| Sleep disorder                    | 17 (5.0)                                    | 9 (2.7)              | 7 (2.1)        | 9 (2.5)            | 42 (3.1)        | 43 (2.9)                                         | 55 (3.7)              | 31 (2.1)        | 29 (2.0)            | 158 (2.6)       |
| Upper respiratory tract infection | 27 (7.9)                                    | 22 (6.6)             | 21 (6.3)       | 28 (7.9)           | 98 (7.2)        | 66 (4.4)                                         | 68 (4.6)              | 63 (4.2)        | 69 (4.7)            | 266 (4.5)       |

<sup>a</sup>Participants may appear in multiple smoking-related-disease subcohorts.

<sup>b</sup>Participants without asthma, COPD, diabetes, or CVD.

<sup>c</sup>Reported in ≥5% of participants in any treatment by cohort group.

MedDRA: Medical Dictionary for Regulatory Activities; NRT: nicotine replacement therapy; PT: preferred term.

**Figure S1** Participant flow diagram

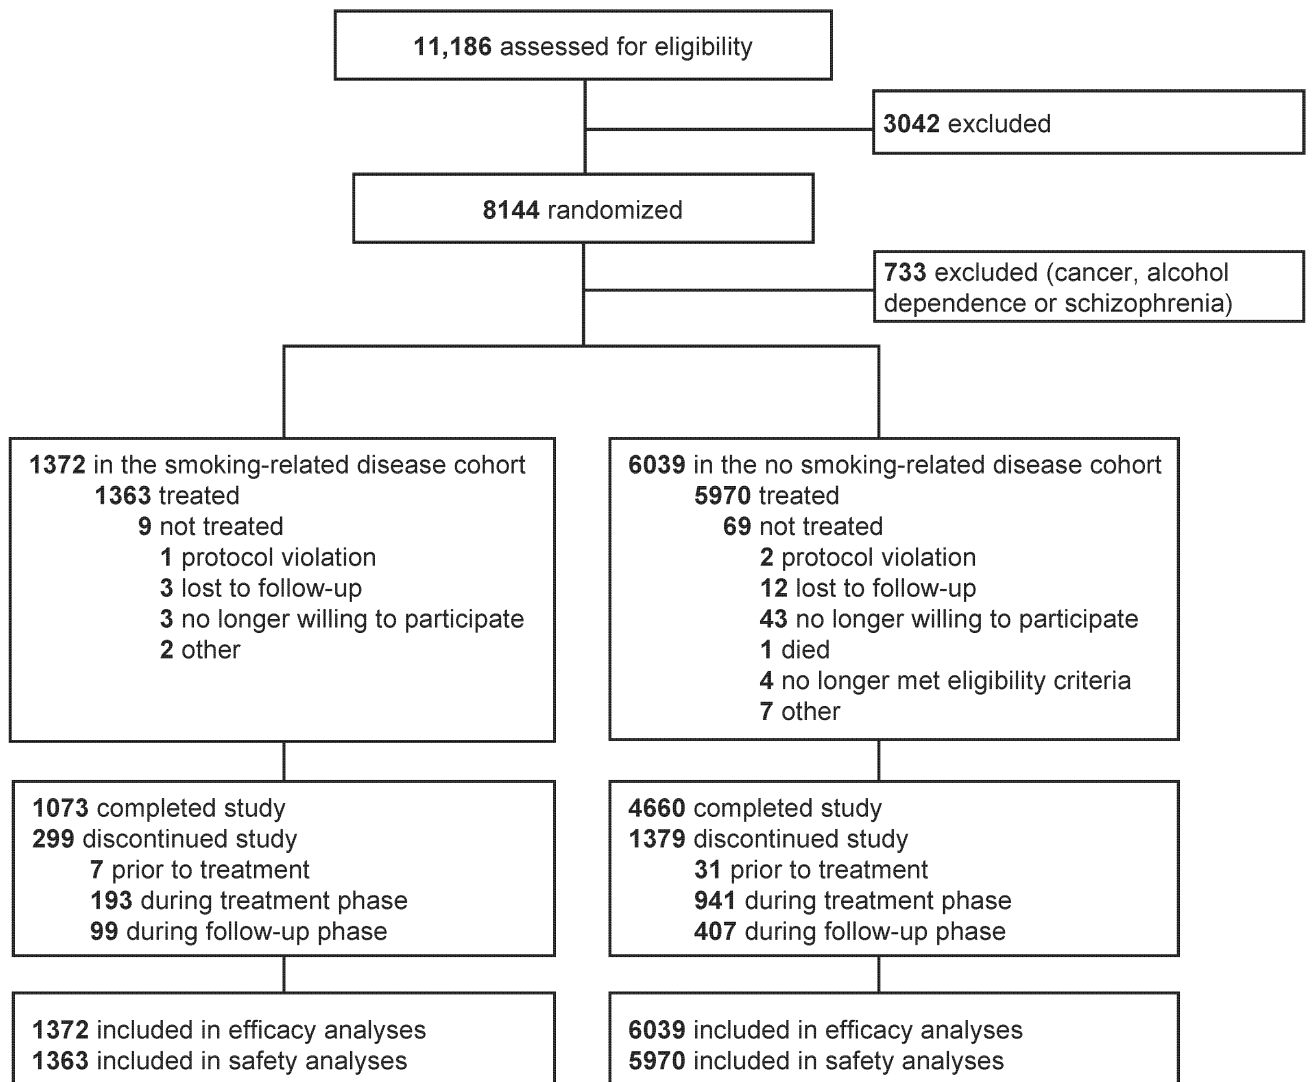

**Figure S2** Comparison of continuous abstinence rates at weeks 9–12 in randomized trials of smokers with and without smoking-associated diseases

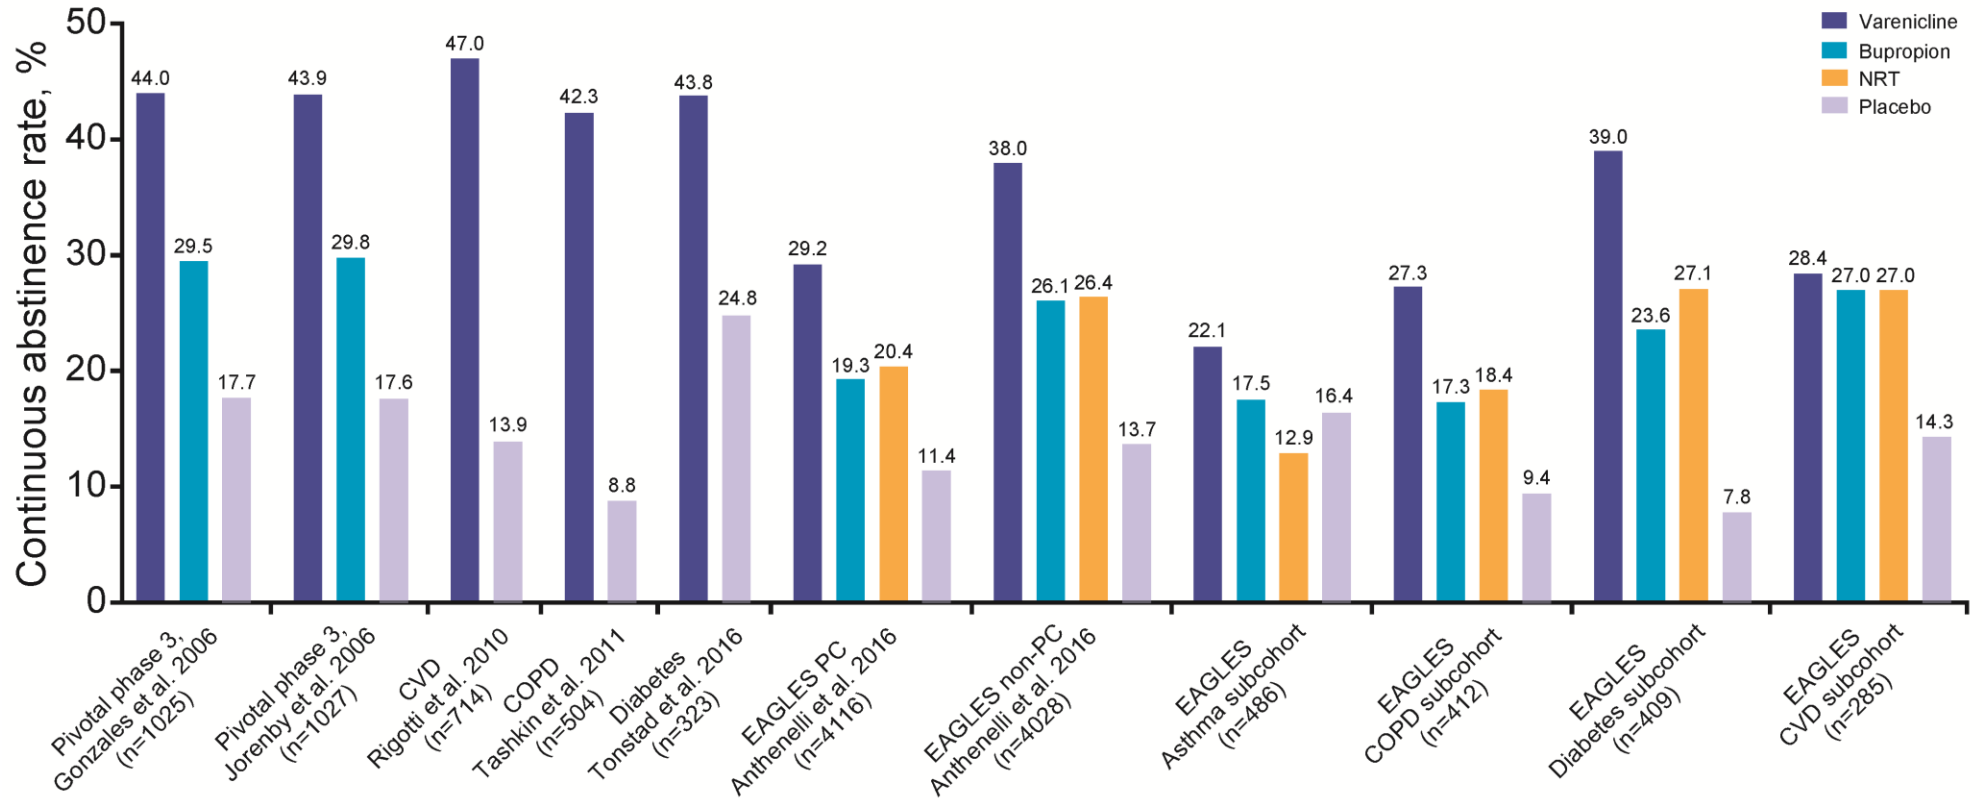

COPD: chronic obstructive pulmonary disease; CVD: cardiovascular disease; EAGLES: Evaluating Adverse Events in a Global Smoking Cessation Study; NRT: nicotine replacement therapy; PC: psychiatric cohort

**Figure S3** Comparison of continuous abstinence rates at weeks 9–24 in randomized trials of smokers with and without smoking-associated diseases

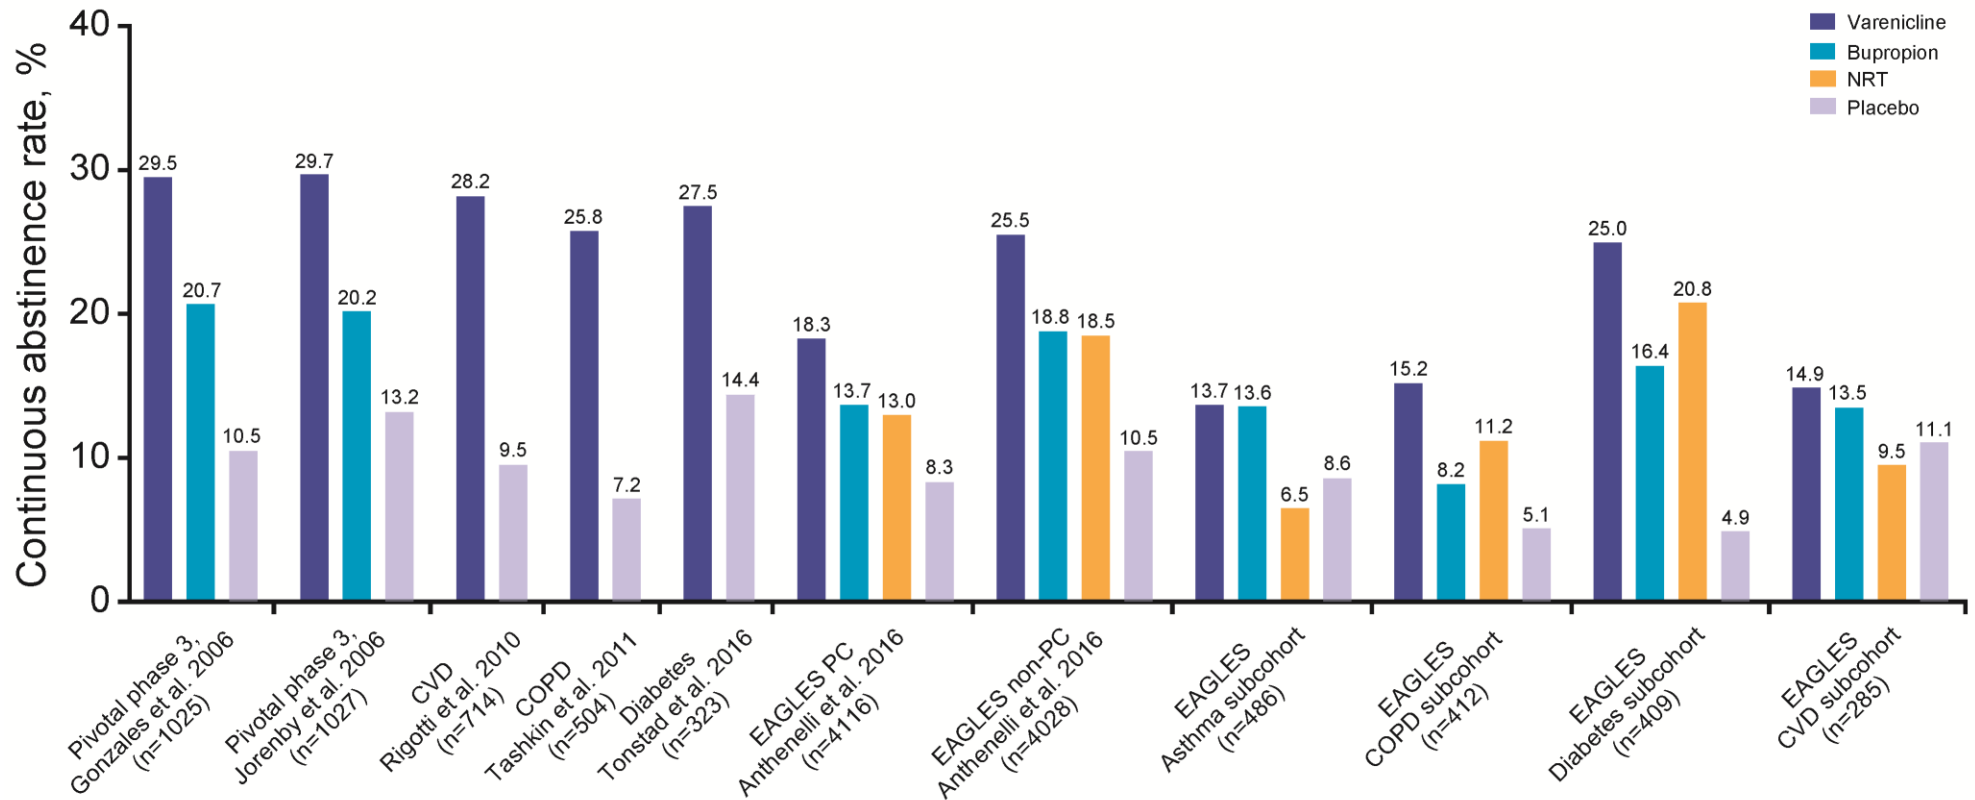

COPD: chronic obstructive pulmonary disease; CVD: cardiovascular disease; EAGLES: Evaluating Adverse Events in a Global Smoking Cessation Study; NRT: nicotine replacement therapy; PC: psychiatric cohort
